# Supplementary material for: Enhanced photovoltaic performance of polymer solar cells through design of a fused dithienosilolodithiophene structure with an enlarged π-conjugated system
Source: Royal Society of Chemistry journal article supplement (doi:10.1039/c8tc00600h), 2018-01-01
Supplement: c8tc00600h1.pdf [file c8tc00600h1.pdf]

# Enhanced photovoltaic performance of polymer solar cells by designing fused dithienosilolodithiophene (DTtS) structure with enlarged $\pi$ -conjugated system

Feng Qi<sup>‡</sup>, Yu Zhang<sup>‡</sup>, Meixiu Wan, Juan Liu, Lijun Huo<sup>\*</sup>

Key Laboratory of Bio-Inspired Smart Interfacial Science and Technology of Ministry of Education, Beijing Key Laboratory of Bio-inspired Energy Materials and Devices, School of Chemistry, Beihang University, Beijing 100191, China. \*E-mail: [huolijun@buaa.edu.cn](mailto:huolijun@buaa.edu.cn)

<sup>‡</sup> Dual Contributors

## Contents for Supporting Informations :

|                                                |    |
|------------------------------------------------|----|
| TGA plots of PDTSDTBT and PDTtSDTBT.....       | S1 |
| DSC curves of polymers.....                    | S2 |
| UV-vis absorption spectra of the polymers..... | S3 |
| Photovoltaic performance.....                  | S4 |

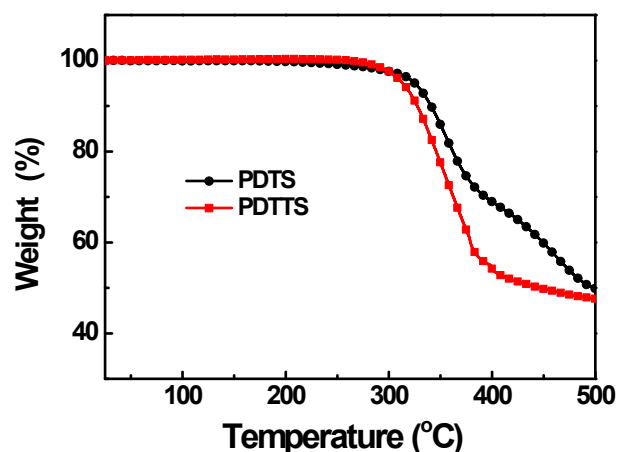

**Figure S1.** TGA plots of PDTSDTBT and PDTtSDTBT with a heating rate of 10 °C/min under an inert atmosphere.

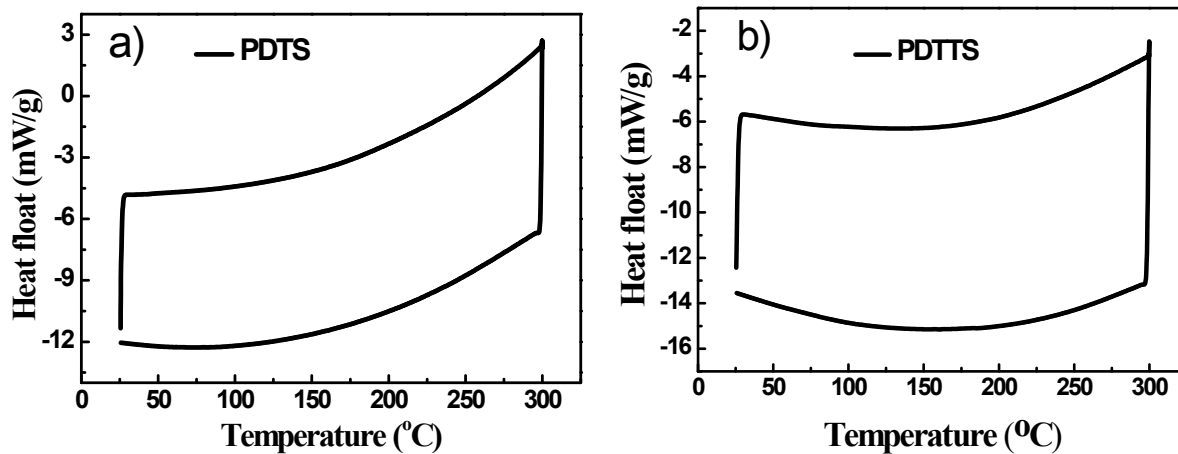

Figure S2. DSC curves of polymers with a scanning rate of 10 °C/min.

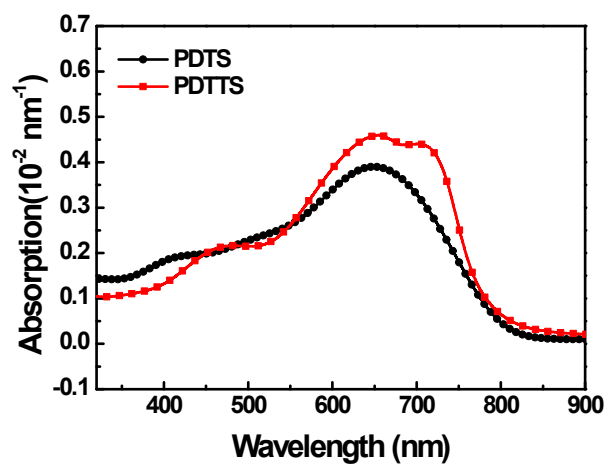

Figure S3. UV-vis absorption spectra of the polymers in film on quartz.

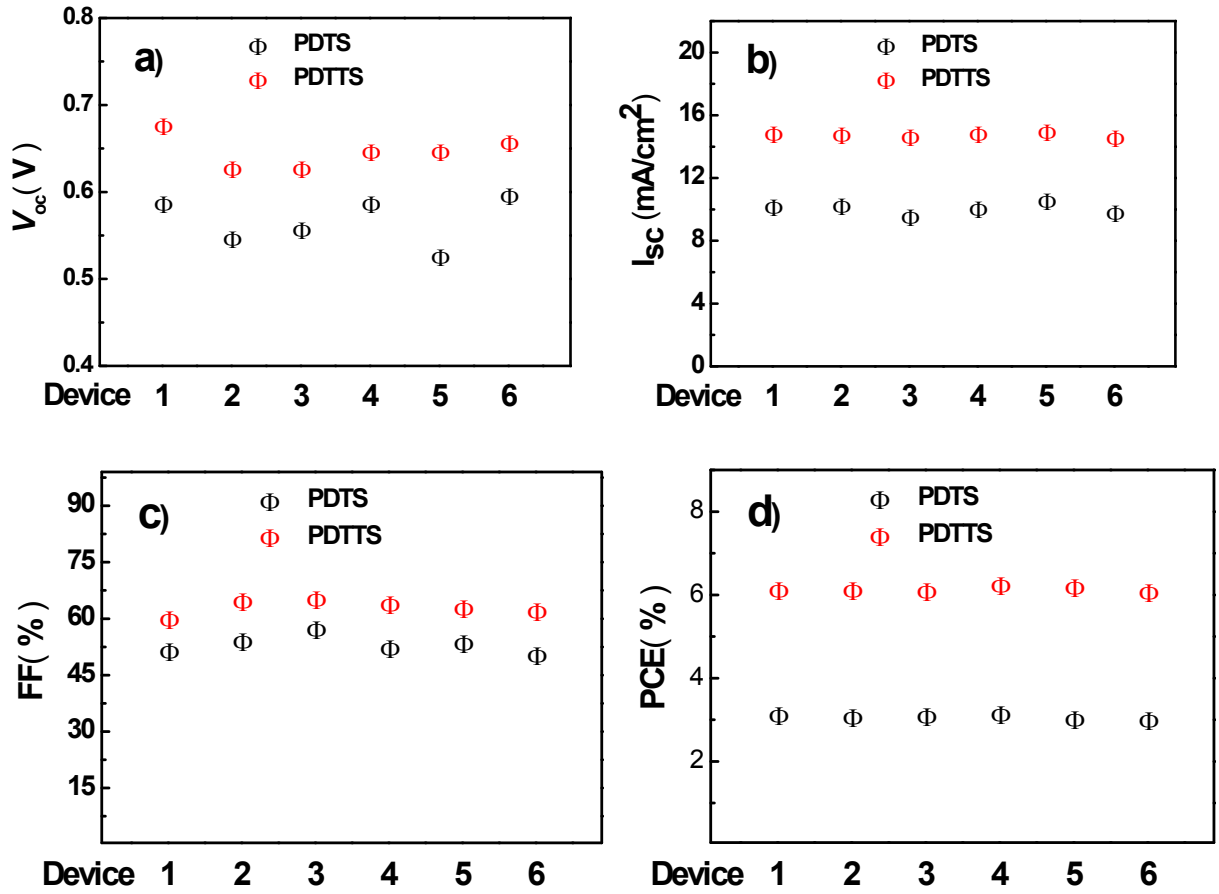

**Figure S4.** a)  $V_{oc}$ , b)  $I_{sc}$ , c)  $FF$  and d)  $PCE$  dependence on Polymer: PC<sub>71</sub>BM(1:1.5) under the illumination of AM1.5G, 100 mW cm<sup>-2</sup>.
